# Supplementary material for: Temporal variations of country-specific mutational profile of SARS-CoV-2: effect on vaccine efficacy
Source: Future Virol. 2021 Nov 12;0(0):10.2217/fvl-2021-0062. doi: 10.2217/fvl-2021-0062 (PMC8603786; doi:10.2217/fvl-2021-0062)
Supplement: Supplementary file 1 [file Supplementary_Table_1a.xlsx]

## Sheet: Sheet1
	NSP1		NSP2																							NSP3
country	NSP1_D75E	NSP1_P80L	NSP2_F10L	NSP2_R27C	NSP2_T85I	NSP2_P91S	NSP2_S99F	NSP2_I120F	NSP2_S128L	NSP2_P129L	NSP2_S138L	NSP2_A159V	NSP2_T166I	NSP2_V198I	NSP2_L204F	NSP2_G212D	NSP2_C253F	NSP2_L271F	NSP2_S299F	NSP2_G339S	NSP2_T388I	NSP2_A411S	NSP2_V469F	NSP2_I559V	NSP2_P585S	NSP3_R30K	NSP3_A58T	NSP3_T73I	NSP3_E111D	NSP3_E120K	NSP3_E124V	NSP3_S126L	NSP3_T127N	NSP3_E134K	NSP3_P141S	NSP3_P153L	NSP3_P153H	NSP3_E154K	NSP3_S176C	NSP3_D218E	NSP3_T237A	NSP3_G282V	NSP3_H290Y	NSP3_L312F	NSP3_F336V	NSP3_H342Y	NSP3_K384N	NSP3_K412N	NSP3_T424I
Australia	2.36559	0	0.113293	0.415408	17.8625	2.49245	0	0.0755287	0	0	0	0	0.0377644	5.24925	0	1.01964	0	0	0	0.0377644	0	0.0377644	0	1.88822	2.98338	0.0410678	0.903491	0.164271	0	0	0	0.862423	0	0	0.205339	2.01232	0	0	0	0.36961	0	2.05339	0	0	0	0	0	0.0410678	0
Bangladesh	0	0	0	0	0	0	0	60.6061	3.0303	0	0	0	0	0	0	0	0	0	0	0	0	6.06061	3.0303	0	0	0	0	0	0	10	0	0	0	0	0	0	0	0	0	0	0	0	0	0	0	0	3.33333	0	0
Belgium	0	0	0	0	10.7448	0	0	0	0	0	0	0	0	0	0	4.51771	0	0	0	0	0	0	0	0.488401	0.488401	0	4.56853	0	0	0	0	0.253807	0	0	0	0	0	0	0	0.761421	0	0	0.126904	0	0	0.126904	0.126904	0	0
Brazil	0	0	0	0	2.0202	0	0	0	0	0	0.1443	0	0	0.1443	0	0.1443	0	0	0	0	0	0	0.1443	0.4329	0.4329	0	0.17762	0	0	0	0	0	0	0	0	0.17762	0	0	0	0	0	0	0	0.17762	0	0.17762	0	0	0
Canada	0.407	0	0.0839631	0.461797	25.3568	0	0	0	0	0.0839631	0	0	0	1.25945	0	0.839631	0	6.54912	0	0.0419815	0	0	0.167926	1.21746	1.30143	0.241546	0.917874	0	0	0	0	0.628019	0	0	0	0.386473	0	0	0	1.44928	0	0	0	0	0	0.0966184	0	0	0.0483092
China	0.106496	0	0	0.104932	1.46904	0	0	0	0	0	0.104932	0	0	3.14795	0	0.734523	0	0	0	0.209864	0	0	0	0.419727	0.314795	0	1.05882	0	0	0	0	0.117647	0	0	0	0	0	0.117647	0	0	0	0	0	0	0	0	0	0	0
Czech Republic	0	0	0	0	19.0476	0	0	0	0	0	0	0	0	0	0	3.1746	0	0	0	0	0	0	0	0	0	0	3.27869	0	0	0	0	0	0	0	0	0	3.27869	0	0	4.91803	0	0	0	0	0	0	0	6.55738	0
Democratic Republic of the Congo	0	0	0	0.621118	0	0	0	0	0	0	1.24224	0	0	0.621118	0	0	0	0	0	0	0	0	0	1.24224	1.24224	0	0	0	14.4737	0	0	0	0	0	0	0	0	0	5.92105	0	3.94737	0	0	1.31579	0	0	0	0	0
Denmark	0	0	0	0.0744048	73.7351	0	0	0	0	0.14881	0	0	21.4286	0.14881	0	2.45536	0	0	0	0.0744048	0	0	0	0.14881	0	0	2.38095	0	0	0	0	0.0744048	0	0	0	0.0744048	0	0	0	0.297619	0	0	0	0.0744048	0	2.30655	0.14881	0	0
France	0	0	0	0.0788643	21.8454	0	0	0	0	0.0788643	0.0788643	0	0	0	0	0.157729	0	0	0	0	0	0	0	0.946372	0.946372	0	0.0825764	0	0	0	0	0.0825764	0	0	0.0825764	0.0825764	0	0.0825764	0	0.330305	0	0	0	0	0	0	0.330305	0	0
Germany	0	0	0	0.2	21.4	0	0	0	0	0	0	0	0	0.4	0	12.6	0	0	0	0.4	0	0	0	2	2	0	8.41584	0	0	0	0	0	0	0	0	0	0	0	0	0.990099	0	0	0	0	0	0	0	0.990099	0
India	0	0	0	2.99401	0.798403	0	0.199601	0	0	0.199601	0.199601	3.19361	0	4.39122	0	0	0	0	0	4.59082	0.199601	0	0	0.199601	0.399202	0	0	0	0	0	0	0	0	0	0	0	0	0	0	0	0	0	0	0	0	0	0	0	0
Ireland	0	0	0	0	1.1811	0	0	0	0	0	0	0	0	0	0	0.787402	6.69291	0	0	0	0	0	0	5.51181	5.51181	0	0.913242	0	0	0	0	0	0	0	0	0	0	0	0	0.913242	0	0	0	0	0	0	0	0	0
Italy	0	0	0	0	0.155279	0	0	0	0	0.155279	0	0	0	0	0.155279	0	0	0	0	0.155279	0	0	0	0	0	0	0	0	0	0	0	0	0	0	0	0	0	0	0	0.35461	0	0	0	0	0	0	0	0	0
Japan	0	0	0	0	2.24888	0	0	0	0	0	0	0	0	0	0	0	0	0	0	0	0	0	0	0.29985	0.29985	0	0	0	0	0	0	0	0	0	0	0	0	7.26173	0	1.059	0	0	0	0	0	0	0	0	0
Kenya	0	0	0	7.27273	0	0	0	0	0	1.81818	0	0	0	7.27273	0	0	0	0	0	0	0	0	0	3.63636	3.63636	0	0	3.125	0	0	0	0	0	0	0	0	0	0	0	0	0	0	0	0	0	0	0	0	3.125
Latvia	0	2.22222	0	0	9.09091	0	0	0	0	0	2.27273	0	2.27273	0	0	4.54545	0	0	2.27273	0	2.27273	0	0	0	0	0	2.22222	0	0	0	0	0	0	0	0	0	0	0	0	0	0	0	0	0	0	2.22222	0	0	0
Mexico	0	0	0	0	11.2903	0	0	0	0	0	0	0	0	0	0	0	0	0	0	0	0	0	0	0	0	0	0	0	0	0	0	0	0	0	0	0	0	0	0	0	0	0	0	0	0	0	0	0	0
Netherlands	0	0	0	0.0823723	12.3559	0	0	0	0.0823723	0	0.494234	0	0	0.247117	0.0823723	1.56507	0	0	0	0.247117	0	0	0	0.164745	0.164745	0	1.46154	0	0	0	0	0.0769231	0	0	0	0.153846	0	0	0	0.230769	0	0	0	0	0	0	0	0.153846	0
New Zealand	0.843882	0	1.3544	0.225734	24.605	0	0	0	0	0	0	0	0	0.677201	0	2.7088	0	0	0	0	0	0	0	2.0316	2.0316	0	2.27273	0	0	0	0	7.67045	0	0	0	1.13636	0	0	0	0.568182	0	0	0	0	0	0	0	0	0
Norway	0	0	0	1.5873	36.5079	0	0	0	0	0	0	0	1.5873	1.5873	3.1746	0	0	0	0	0	0	0	0	0	0	0	0	0	0	0	0	0	0	0	0	0	0	0	0	0	0	0	0	0	2.7027	0	0	0	0
Peru	0	0	0	1.98676	1.3245	0	0	0	0	0	0	0	0	0	0	0	0	0	0	0	0	0	0	0	0	0	0	0	0	0	0	0	0	0	0	0	0	0	0	0	0	0	0	0	0	0	0	0	0
Poland	0	0	0	0	5.73771	0	0	0	0	0	0	0	0	0	0	0.819672	0	0	0	1.63934	0	0	0	10.6557	10.6557	0	0.884956	0	0	0	6.19469	0	0	0	0	0	0	0	0	0	0	0	5.30973	2.65487	0	1.76991	0	0	0
Portugal	0	0	0	0	2.92758	0	0	0	0	0	0	0	0	0	0	0.46225	0	0	0	0.0770416	0	0	0	3.15871	3.15871	4.095	0.491401	0	0	0	0	0	0	0	12.2031	0.0819001	0	0	0	0.491401	0	0	0	0.491401	0	0	0	0	0
Russia	0	0	0	0	7.04698	0	0	0	0	3.02013	0	0	0	0	0	0	0	1.00671	0	0.33557	0	0	0	0	0	0	0	0	0	0	0	0	0	0	5.05051	0	0	0	0	2.3569	0	0	0	0	0	0	0	0.3367	0
Saudi Arabia	0	0	0	0	0.78534	0	0	0	0	0	0.52356	0	0	0	0	0	0	0	0	0	0	0	0	0	0	0	0	0	0	0	0	0	0	0	0	0	0	0	0	0	0	0	0	0	0	0	0	0	0
Singapore	0.812065	0	0	0	6.43275	0	0	0	0	0	0	0.233918	0	0.116959	0	0.701754	0	0	0	0.116959	0	0	0	0.584795	0.701754	0	0.143472	0.143472	0	0	0	0	0	0	0	0.573888	0.143472	0	0	0.143472	0	0	0	0	0	0.430416	0	0	0
South Africa	0	0	0	0	0	0	0	0	0	0	0	0	0	0	0	0.746269	0	0	0	0	0	0	0	1.49254	2.23881	0	0	0	0	0	0	0	0	0	0	0	0	0	0	0	0	0	0	0	0	0	0	0	0
South Korea	2.09205	0	0	0	7.26496	0	2.13675	0	0	0	0	0	0.42735	0	0	0	0	0	0	0.42735	0	0	0	3.4188	3.4188	0	0	0	0	0	0	0	0	2.1097	0	0	0	0	0	0	0	0	0	0	0	0	0	0	0
Spain	0	0	0	0	4.63014	0	0	0	0	0.0273973	0	0	0	0	0	0	0	0	0	0.0273973	0	0	0	0.0547945	0.0547945	0	0	0	0	0	0	0.0322165	0	0	0	0	0	0	0	0.0966495	0	0	0	0.0322165	0	0	0.0322165	0	0.0322165
Sweden	0	0	0	0.195312	33.0078	0	0.195312	0	0	0	0	0	1.36719	1.75781	0	2.53906	0	0	0	0.195312	0	0	0	0.195312	0.195312	0.191939	2.30326	0.191939	0	0	0	0	0	0	0	0	0	0	0	1.91939	0	0	0	0	0	0.191939	0	0	0
Switzerland	0	0	0	0.144404	7.22022	0	0	0	0	0.144404	0.144404	0	0	0.144404	0	0.216607	0	0	0	0.216607	0	0	0	0.361011	0.361011	0	0.101523	0	0	0	0	0	0	0	0	0	0	0	0	0.507614	0	0	0	0	0	0	0	0	0
United Arab Emirates	0.769231	0	0	9.23077	3.07692	0	1.53846	0	0	0	0	0	0	13.8461	0	0	0	0	0	0	0	0	0	0	0	0	0	0	0	0	0	0	3.125	0	0	0.78125	0	0	0	3.125	0	0	0	0	0	0	0	0	0
United Kingdom	0.0706539	0.0035327	0	0.0877083	4.60677	0.18377	0.071002	0	0	0.0334127	0.0793551	0.0125298	0.00417659	0.179593	0.0167063	2.67719	0	0.00835317	0.0125298	0.304891	0.238065	0	0.00417659	7.1169	7.51785	0	2.28697	0.130951	0.0140305	0	0	0.154335	0	0	0.0187073	0.140305	0	0	0	0.757647	0	0	0.0327378	0.028061	0	0.0140305	0.0187073	0.0327378	0.0140305
USA	3.49758	0	2.18982	0.0893805	58.7453	0.00558628	0.0111726	0	0.0111726	0.139657	0.0279314	0.00558628	0	0.312832	0	0.15083	0	0.0670354	0	0.100553	0.0167588	0	0	0.553042	0.569801	0.161601	0.167817	0.00621543	0	0	0	0.111878	0	0	0.0186463	3.44956	0	0	0	0.0621543	0	0	0.0124309	0.0310771	0	0.00621543	0.335633	0.0559388	0.0248617
All frequently mutated amino acid residues, i.e, the sites that have encountered substitutions in 2% or more of all SARS-CoV-2 isolates, in at least one country, before May (Group B)
The frequencies above 2% have been highlighted in ‘red’
[truncated: 285 more columns]
