# Supplementary material for: Temporal variations of country-specific mutational profile of SARS-CoV-2: effect on vaccine efficacy
Source: Future Virol. 2021 Nov 12;0(0):10.2217/fvl-2021-0062. doi: 10.2217/fvl-2021-0062 (PMC8603786; doi:10.2217/fvl-2021-0062)
Supplement: Supplementary file 2 [file Supplementary_Table_1b.xlsx]

## Sheet: Sheet2
	NSP1						NSP2
country	NSP1_R24C	NSP1_H45Y	NSP1_D75N	NSP1_P80S	NSP1_V86F	NSP1_D144A	NSP2_F10L	NSP2_D23Y	NSP2_A26V	NSP2_R27C	NSP2_T85I	NSP2_P96S	NSP2_K110N	NSP2_K112N	NSP2_G115C	NSP2_M117V	NSP2_I120F	NSP2_S122F	NSP2_V126F	NSP2_P129L	NSP2_P129S	NSP2_N133D	NSP2_M135I	NSP2_S138L	NSP2_D144G	NSP2_K171E	NSP2_A192V	NSP2_S196L	NSP2_V198I	NSP2_R218C	NSP2_G220D	NSP2_H237Y	NSP2_A247S	NSP2_I251M	NSP2_C253F	NSP2_T256I	NSP2_G265S	NSP2_L274F	NSP2_A294V	NSP2_A336V	NSP2_G339S	NSP2_K347N	NSP2_T374P	NSP2_A381V	NSP2_R399K	NSP2_T412I	NSP2_M418K	NSP2_Q427H	NSP2_T429I
Australia	0.019755	0	0	0	0	0	0.00947508	0	0.0284252	0.0758006	1.02331	0	0	0.0284252	0	0.0284252	95.1867	0.00947508	0	0.0379003	0.0189502	0.0189502	0	0.00947508	0	0	0	0.0189502	0.123176	0	0	0.0189502	0	0.00947508	0	0.00947508	0.0379003	0.00947508	0	0.0473754	0.0379003	0	0	0.170551	0	0	0	0.0189502	0
Bangladesh	0.257732	0	0	0	0	0	0	0	0	0	0	0	0	0	0.27933	0	80.7263	0	0	0.27933	1.11732	0.558659	0	0	0	0	0	0	0	0.27933	0	0	0	0	0	0	0	0	0	0	0.558659	0	0	0	0	3.35195	0	0.558659	0.27933
Belgium	17.3139	0	0	0	0	0	0	0.953895	0	0	1.43084	0	0	0	0	0	0	0	0.317965	0.158982	0	0	0	0	0	0	0	0	0	0	0.476948	0	0	0	0	3.17965	0	0.317965	0	0.158982	0	0	0	0.476948	0	0	0	0	0
Brazil	0	0	0	0	0	0	0	0	0	0	0	0	0	0	0	0	0	0	0	0	0	0	0	0	0	0	0	0	0	0	0	0	0	0	0	0	0	0	0	0	0	0	0	0	0	0	0	2.91971	0
Canada	0	0	0	0	0	0	0	0	0	0	33.7329	0	0	0	0	0	0	0.171233	0	0	7.70548	0	0	0.342466	0	0	0	0.171233	0.171233	0	0	0	0	0	0	0	0	0	0	0	0	0	0	0	0	0.171233	0	0.171233	0
China	0	0	0	0	0	0	0	0	0	0	2.12766	0	0	0	0	0	0	0.70922	0	0	0	0	0	0	0	0	0	0	0	0	0	0	0	0	0	0.70922	0	0	0	0	0	0	0	9.92908	0	0	0	0	2.83688
Czech Republic	0.689655	0	2.06897	0	0	0	0	0	0	0	0	5.47945	2.73973	0	0	0	0	2.05479	0	0	0	0	0	0	0	0	0	0	0	0	0	0	0	0.684932	0	0	0	0	0	0	0	0	0	0	0	0	0	0	0
Democratic Republic of the Congo	0.555556	0	0	0	0	0	0	0	0	1.34228	0	0	0	0	0	0	0	0	0	0	1.34228	0	0	2.68456	0	0	0	0	0	0	0	0	0	0	0	0	2.01342	0	0	0	0	0	0	0	0	0	0	0	0.671141
Denmark	0.311306	0.0424508	0	0	0	0.0141503	0	0	0.113234	0.0566171	5.12385	0	0	0.0141543	0	0.184006	0.0424629	0.0566171	0.0283086	0.0283086	0.0424629	0	0.0283086	0.0283086	0	0	0.0424629	6.31281	0.0141543	0.0141543	0.19816	0.0849257	0	0.155697	0	0.0283086	0	0.0566171	0	0.0566171	1.04742	0	0	0.0141543	0	0.0849257	0	0.552017	0.113234
France	0	2.20386	0	1.65289	0	0	0	0	0	0	11.1433	0	0	0	2.31548	0	0.144718	0	4.9204	0	0	0	0	0	0	0	0	0	0	0	0	0	0	0	0	0	0	4.9204	0	0	0	0	0	0	0	0	0	0.144718	0
Germany	0	0	0	0	0	0	0	0	0	0	29.8165	0.458716	0	2.29358	0	0	0.458716	0	0	0	0	0	0	0	0	0	0	0	0	0	0	0	0	0	0	0	0	0	0	0	1.83486	0	2.29358	0	0	0	0	0	0
India	0.083091	0.0415455	0	0	0	0	0	0	0	0.668577	0.668577	0	0	0	0	0	0	0	0	0.095511	0.0477555	0	0	1.95798	0	0	0.0477555	0	0.668577	0	0	0.0477555	0	0	0	0.191022	0	0	0	0.0477555	1.05062	0.0477555	0	2.29226	0	0	0	0	0.238778
Ireland	0	0	0	0	0	0	0	0	0	0	4.88889	0	0	0	0	0	0.666667	0.666667	0	0.222222	0	0	0	0	0	0	0	0	0	0	34.2222	0	5.33333	0	2.22222	0	0	0	0	0	0.222222	0	0	0.444444	0	0	0	0	0
Italy	0	0	0	4.52489	0	0	0	0	0	0	0	0	0	0	0	0	2.8436	0	1.4218	0.947867	0	0.473934	0	0	0.473934	0	0	0.473934	0	0	0	0	0	0	0	0	0	0.947867	0	0	0.947867	0	0	0	0	0	0	0	0
Japan	0	0	0	0	0	0	0	0	0	0	1.68067	0.840336	0	0	0	0	0	0.840336	0	0	0	0	0	0	0	0	0	0	0	0	0	0	0	0	0	0	0	0	0	0.420168	0.840336	0	0	0.840336	0	0	0	0	0
Kenya	0	0	0	0	0	0	0	0	0	0	4.65116	0	0	0	0	0	0	0	0	0	0	0	0	0	0	0	0	0	0	0	0	0	0	0	0	0	0	0	0	2.32558	2.32558	0	0	0	0	0	0	0	0
Latvia	0	0	0	0	0	0	0	0	0	0	0.649351	0	0	0	0	0	0	0	0	0	0	22.0779	0	0	0	0	0	0	0	0	0	0	0	3.8961	0	0	0	0	0	0	0.649351	0	0	0	0	0	0	0	0
Mexico	0	0	0	0	0	0	0	0	0	0	8.24176	0	1.64835	0	0	0	0	0	0	1.0989	0.54945	0	0	0	0	0	0	0.54945	0	0	0	0	0	0.54945	0	0	0	0	0	0	0	0	0	0	0	0	0	0	0
Netherlands	0	0	0	0	0.125865	0	0	0.13587	0	0	4.8913	0.203804	0	0	0	0	0.13587	1.3587	0	0.0679348	0	0	0	0.13587	0.0679348	0	8.62772	0	0.13587	4.21196	0	0	0	0	0	0.0679348	0	0	0	0	0.339674	0	0	0	0	0	0	0	0
New Zealand	0	0	0	0	0	0	0	0	0	0	2.27273	0	0	0	0	0.454545	0	0	0	0	0	0	0	0.454545	0	5.45455	0	0	0	0	0	5.90909	0	0.454545	0	0	0	0	0	1.36364	0	0	0	9.09091	0	0	0	0	0
Norway	0.20202	0	0	0	0	0	0	0	7.21443	0	8.81763	0	0	0	0.400802	0	0	0	0	0	0	0.801603	0	0.200401	0	0	0	0	0	0.200401	1.2024	0	0	0	0	0	0	0.200401	0	0	0	0	0	0	0	0	0	0	0
Peru	0	0.458716	0	0	0	0	0	0	0	0	0	0	0	0	0	0	0	0	0	0	0	0	0	0	0	0	0	0	0	0	0	0	0	0	0	0	0	0	0	0.462963	0.462963	0	0	0	0	0.462963	0	0	0
Poland	0	0	0	0	0	0	0	0	0	0	5	0	0	0	0	0	0	0	0	0	0	0	0	0	0	0	0	0	0	0	0	0	0	0	0	0	0	0	4	0	0	0	0	0	3	0	0	0	0
Portugal	0.862069	0	0	0	0	0	0	3.50877	0	0	0	0	0	0	0	0	0	0	0	0	0	0	0	0	0	0	0	0	0	0	0	0	0	0	0	0	0	0	0	0	0	0	0	0	0	0	0	0	0
Russia	0	0	0	0.317965	0	0	0	0	0	0	0.944882	0	0	0.15748	0	0	0	0.15748	0	0.15748	0	0	0	0	0	0.15748	0.314961	0	0.15748	0	0	0.787402	0	0.314961	0	0	0	0	0	0.472441	0.787402	0	0	0	0	0.314961	0	0	0.15748
Saudi Arabia	0	0	0	0	0	0	0	0	0	0	0	0	0	0	0	0	0	0	0	3.88889	0	0	1.66667	0	0	0	0	0	0	0	0	0	0	0	0	0	0	0	0	0	0	0	0	0	0	0	0	0	0
Singapore	0	0	0	0	0	0	0	0	0	0	1.06195	0	0	0	0.176991	0	0.353982	0	0	0.530973	0	0	0	0.530973	0	0	0	0.176991	0.176991	1.23894	0	0.176991	0	0.176991	0	0.176991	0	0	0	0.884956	0.176991	2.47788	0	3.36283	0	0.353982	0	0	0
South Africa	0.0952835	0.0952835	0	0	0	0	0	0	0	0	1.33618	0	0	0.160342	0	0	0	0.0534473	0	0	0.267237	0	0	0.267237	0	0	0.0534473	0.160342	0	0.0534473	0	0	0	0.0534473	0	0	0	0	0	0.0534473	0.267237	0	0	0	0	0.0534473	0	0.0534473	0
South Korea	0	0	0	0	0.331675	0	0	0	0.5	0	83.5	0	0	0	0	0	0.5	0	0	0	0	0.166667	0	0	0	0	0	0	0.166667	0	0	0	0	0	0	0	0	0	0	0	0	0	0	0	0	0.166667	3.33333	0.166667	0
Spain	0	0	0	0	0	0	0	0	0	0	0.712378	0	0	0	0	0	0	0	0	0	0	0	0	0	0	0	0	0.0890472	0	0	0	0.0890472	0	0	0.0890472	0.0890472	0	0.178094	0.0890472	0	0.712378	0	0	0	0	0	0	0.0890472	0.178094
Sweden	0.921659	0	0	0	0.230415	0	0	0	0.230415	0	23.9631	0	0	0	0.230415	0	0	0	0	0.230415	0.46083	0	0	0.691244	0	0	0	0	0	0	0	0	0	0.230415	0	0	0	0.921659	0	0.691244	0	0	0	0	0.230415	0	0	0.921659	0
Switzerland	0	0	0	0.149142	0	0	0	0	0	0.0708215	3.89518	0.212465	0	0	0	0.141643	0	0.212465	0	0	0	0	0	0	3.18697	0	0	0	0	0	0.0708215	0	0	0	0	0.0708215	0.0708215	0.0708215	0	0	0.566572	0	0	0	0	0	0	0	0
United Arab Emirates	0	0	0	0	2.65487	0	0	0	0.877193	3.50877	0	0	0	0	0	5.26316	6.14035	0	0	0	0	0	0	0	0	0	0	0	3.50877	0	0	0	0	5.26316	0	0	0	0	0	0	0	0	0	0	0	0	0	0	0
United Kingdom	0.125478	0.0380662	0.00986902	0.0155085	0.0183282	0	0	0.321112	0.113087	0.0781839	1.36961	0.00279228	0.00139614	0.0879569	0.0418842	0.0181498	4.40064	0.233156	0.0335074	0.53891	0.153576	0.00139614	2.21288	0.107503	0.00139614	0	0.00837685	0.0251305	0.0111691	0.099126	0.71622	0.103314	0.0335074	0.0586379	0	0.00837685	0.00418842	0.0432804	0.00139614	0.0167537	0.319716	0	0	2.09421	0.00279228	0.0181498	0	0.152179	0.0376958
USA	2.35698	0.0974342	0.0278384	0	0.0185589	2.36162	4.03385	0.0336555	0.0480792	0.110582	51.6948	0	0.149046	0.0913506	0.0576951	0	0	0.187509	0.144238	0.245204	0.0576951	0	0.00480792	0.264436	0.062503	0	0.187509	0.0288475	0.00961585	0.34617	0	0.27886	0	0	0	0.11539	0.00961585	0.0865426	0.00480792	0.735612	0.274052	0	0	0.0144238	0.0144238	0.00961585	0	0.34617	0.00961585
All frequently mutated amino acid residues, i.e, the sites that have encountered substitutions in 2% or more of all SARS-CoV-2 isolates, in at least one country, after May (Group A)
The frequencies above 2% have been highlighted in ‘red’
[truncated: 607 more columns]
