# Supplementary material for: Temporal variations of country-specific mutational profile of SARS-CoV-2: effect on vaccine efficacy
Source: Future Virol. 2021 Nov 12;0(0):10.2217/fvl-2021-0062. doi: 10.2217/fvl-2021-0062 (PMC8603786; doi:10.2217/fvl-2021-0062)
Supplement: Supplementary file 5 [file Supplementary_Table_4.xlsx]

## Sheet: Sheet1
	NSP2				NSP3										NSP4	NSP5	NSP6			NSP7		NSP8	NSP9	NSP10	NSP12						NSP13				NSP16	S							ORF3a		M		ORF6
	85	120	133	220	203	284	428	951	994	1189	1197	1198	1438	1683	324	15	37	46	86	25	71	141	101	59	59	97	185	323	720	776	218	261	290	598	6	18	222	439	477	614	936	1176	57	110	2	3	33	84	92
WT Residue	T	I	N	G	Q	S	T	M	A	T	S	T	N	I	M	G	L	A	M	S	L	T	M	P	K	A	A	L	V	V	K	E	H	A	Q	L	A	N	S	D	D	V	Q	A	A	D	I	L	E
AUSTRALIA (12098)		F																																					N	G
BANGLADESH (409)		F																																						G
BELGIUM (1425)																																								G
																																								G
BRAZIL (1028)																																								G							T
																					F																			G		F
																																								G		F
																																								G
																																								G
CANADA (2897)																																								G
																																								G
	I																																							G			H
CHINA (1067)																												P
																												P																				S
CZECH REPUBLIC (200)																																								G
														T									I						I				Y	S						G
																																								G
DEMOCRATIC REPUBLIC OF THE CONGO (309)																																								G
																	F																							G
																																								G						G
																																								G
DENMARK (7985)																																								G
																																					V			G
	I																																							G			H
															I												S			L	R	D							N	G			H
FRANCE (1992)																																								G
																																								G			H
	I																																							G			H
															I												S			L	R	D							N	G			H
																																								G
GERMANY (762)																																								G
																												P
	I																																							G			H
																																								G
INDIA (2689)									D																															G
																																								G
																																								G			H
												K					F									V		P
IRELAND (612)																																								G
				D				I						T			F																Y					K		G
																																					V			G
ITALY (885)																																								G
																																								G
JAPAN (898)																																								G
																												P																				S
																	F											P
																												P
KENYA (61)																																								G
																																								G
																												P
LATVIA (193)																																								G
					R	G																		T																G				S	V
																																								G
			D																			M				V														G			H
MEXICO (269)																																								G
																																								G
NETHERLANDS (2556)																																								G
																																								G
																		V																						G			H
NEW ZEALAND (642)																																								G
																																								G
	I																																							G			H
																												P
							I									S																								G
NORWAY (552)																																								G
															I																									G			H
	I																																							G			H
										I																											V			G
PERU (370)							I									S																								G
																																								G
																																								G
																																								G						G
POLAND (219)																																								G
																																								G
													D												N															G
PORTUGAL (1455)																																								G
																																								G
RUSSIA (938)																																								G
																																								G
SAUDI ARABIA (559)																																								G			H
																																								G
SINGAPORE (1448)											R	K														V		P
																																								G
																												P
																	F																							G
SOUTH AFRICA (1787)																																								G
																																								G
SOUTH KOREA (830)	I																			L															L					G			H
								I									F											P
																																								G
SPAIN (4966)																																								G
																												P																				S
																																					V			G
																																								G
SWEDEN (928)																																								G
	I																																							G	Y		H
																																								G
SWITZERLAND (2921)																																								G
																																								G
																																					V			G
UNITED ARAB EMIRATES (225)																																								G
																																								G
																			I									P																				S	K
																												P
UNITED KINGDOM (98553)																																								G
																																								G
																																				F	V			G
																																					V			G
USA (40374)	I																																							G			H
																																								G
[truncated: 11 more columns]
